# Supplementary material for: Mining small RNA structure elements in untranslated regions of human and mouse mRNAs using structure-based alignment
Source: Springer Nature journal article supplement (doi:10.1186/1471-2164-9-189), 2008-04-25
Supplement: Additional file 3 [file 1471-2164-9-189-s3.pdf]

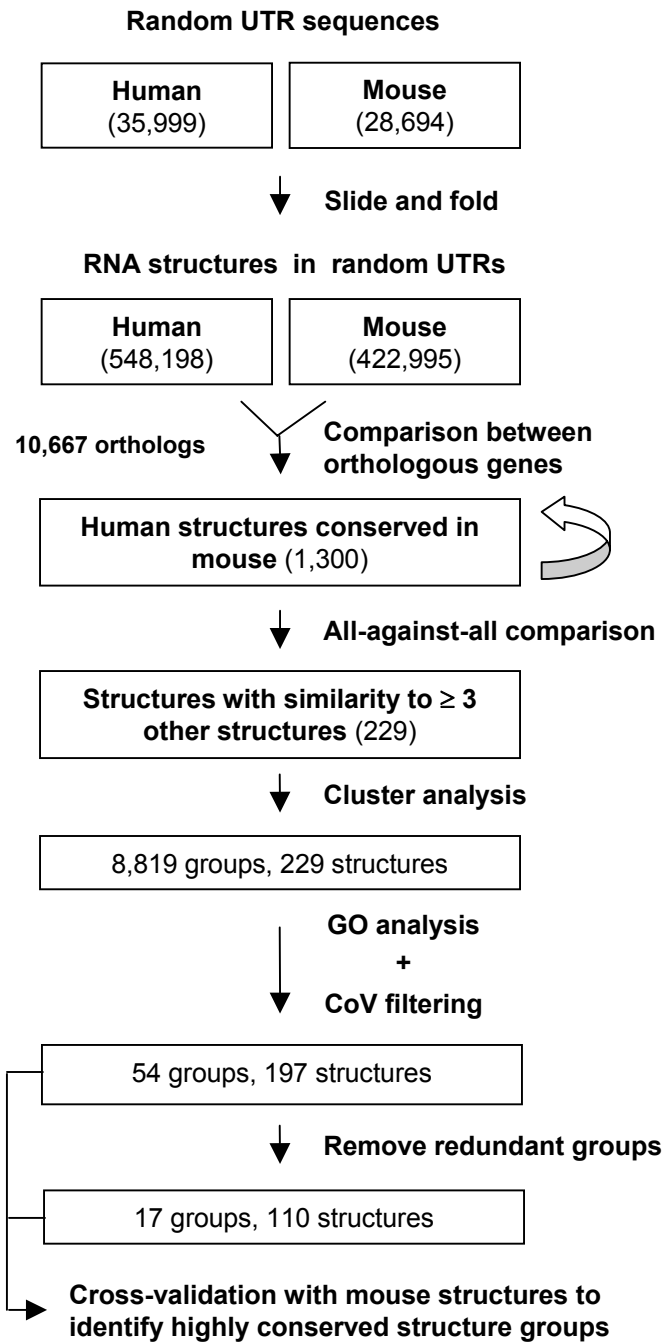

**Additional file 3. GLEAN-UTR for randomized UTR sequences.** UTR sequences randomized by 1-order Markov chain were subject to the same GLEAN-UTR approach as shown in Figure 1. The numbers of structures and structure groups are shown in parenthesis.
